# Supplementary material
Source: publisher figshare collection journal article supplement (https://acs.figshare.com/ndownloader/files/4469263)
Supplement: Supplementary file 1 [file 4469263]

## Supporting Information:

### Cytotoxic Polyisoprenyl Benzophenonoids from *Garcinia subelliptica*

Li-Jie Zhang,<sup>†</sup> Chun-Tang Chiou,<sup>†</sup> Jing-Jy Cheng,<sup>†</sup> Hui-Chi Huang,<sup>‡</sup> Li-Ming Yang  
Kuo,<sup>†</sup> Chia-Chin Liao,<sup>†</sup> Kenneth F. Bastow,<sup>§</sup> Kuo-Hsiung Lee,<sup>\*,§</sup> and Yao-Haur  
Kuo,<sup>\*,†,⊥</sup>

<sup>†</sup> *National Research Institute of Chinese Medicine, Taipei 112, Taiwan*

<sup>‡</sup> *School of Chinese Medicine Resources, China Medical University, Taichung, 404,  
Taiwan*

<sup>§</sup> *Natural Products Research Laboratories, Division of Medicinal Chemistry and  
Natural Products, Eshelman School of Pharmacy, University of North Carolina  
Chapel Hill, NC 27599-7360*

<sup>⊥</sup> *Graduate Institute of Integrated Medicine, China Medical University, Taichung  
404, Taiwan*

---

\* To whom correspondence should be addressed: Y.H.K.: Tel.886-02-28201999 ext. 7051. E-mail:

[kuoyh@nricm.edu.tw](mailto:kuoyh@nricm.edu.tw). K.H.L.: Tel. 919-962-0066. E-mail: [khlee@unc.edu](mailto:khlee@unc.edu)

**Figure S1:**  $^1\text{H}$  NMR spectrum of Compound **1**

**Figure S2:**  $^{13}\text{C}$  NMR spectrum of Compound **1**

**Figure S3:**  $^1\text{H}$  NMR spectrum of Compound **2**

**Figure S4:**  $^{13}\text{C}$  NMR spectrum of Compound **2**

**Figure S5:**  $^1\text{H}$  NMR spectrum of Compound **3**

**Figure S6:**  $^{13}\text{C}$  NMR spectrum of Compound **3**

**Figure S7:**  $^1\text{H}$  NMR spectrum of Compound **4**

**Figure S8:**  $^{13}\text{C}$  NMR spectrum of Compound **4**

**Figure S9:**  $^1\text{H}$  NMR spectrum of Compound **5**

**Figure S10:**  $^{13}\text{C}$  NMR spectrum of Compound **5**

**Figure S11:**  $^1\text{H}$  NMR spectrum of Compound **6**

**Figure S12:**  $^{13}\text{C}$  NMR spectrum of Compound **6**

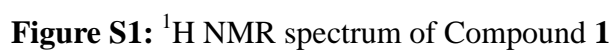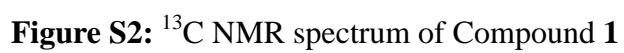

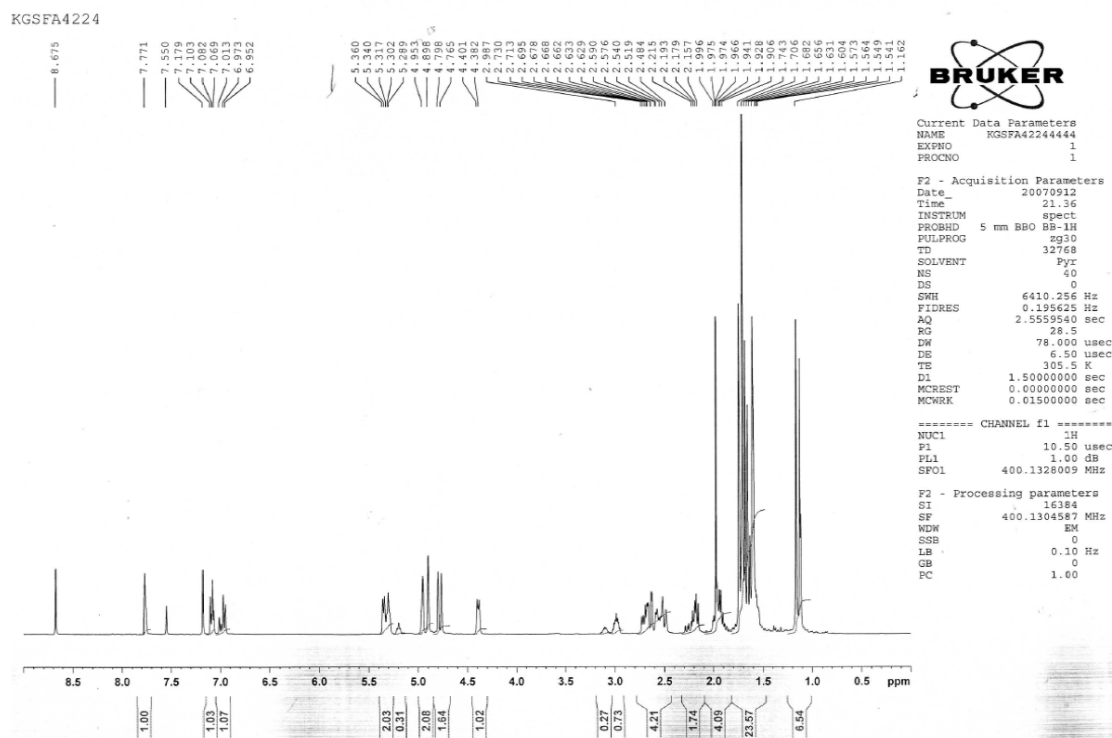

**Figure S3:**  $^1\text{H}$  NMR spectrum of Compound 2

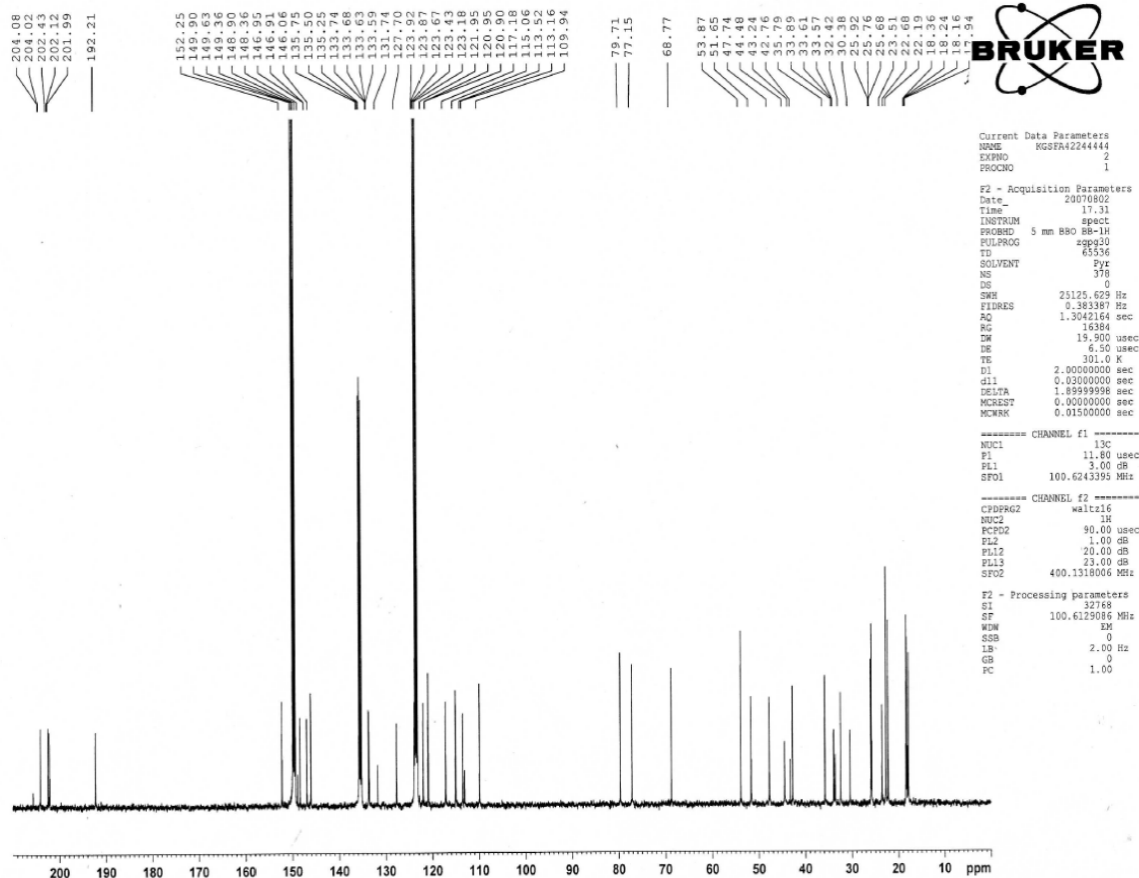

**Figure S4:**  $^{13}\text{C}$  NMR spectrum of Compound 2

9SFA 4224335

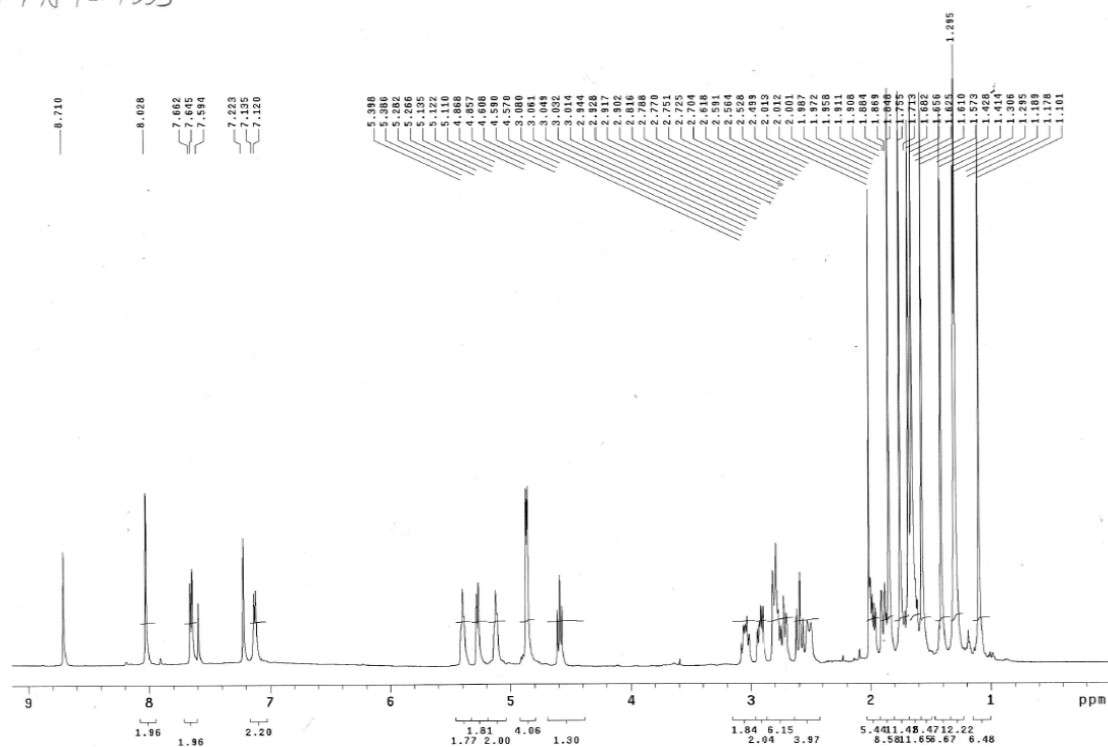

Figure S5:  $^1\text{H}$  NMR spectrum of Compound 3

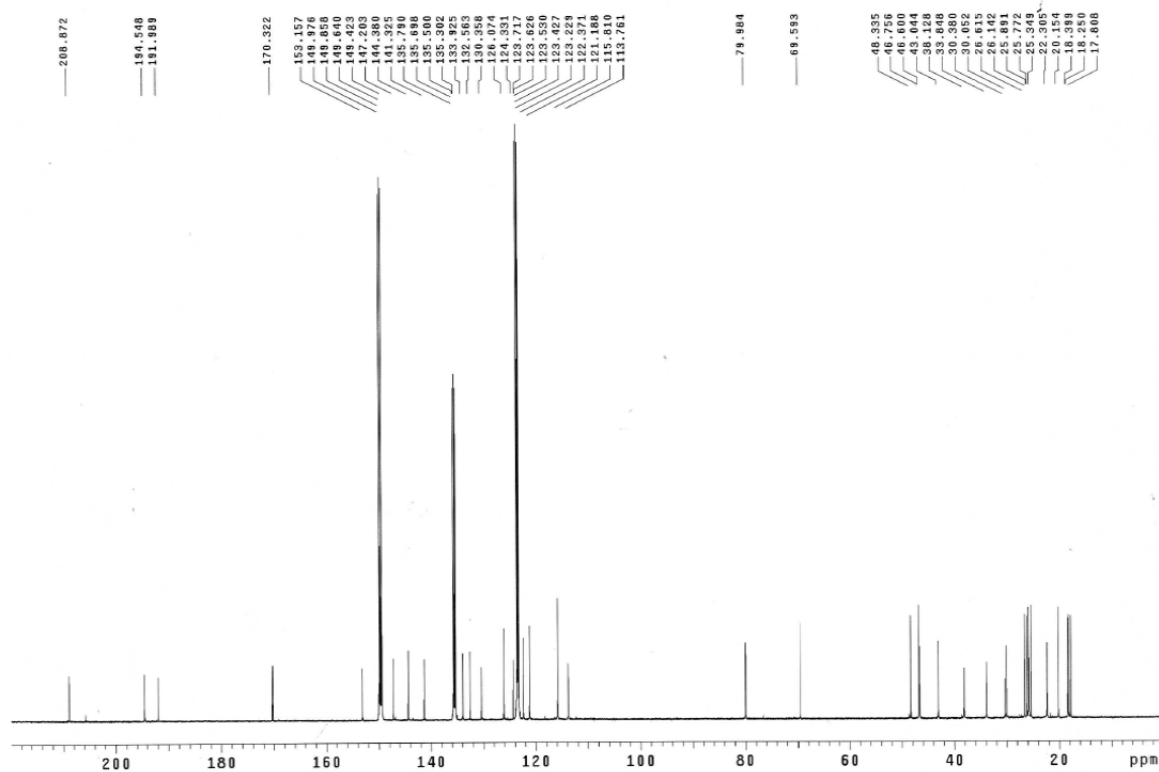

Figure S6:  $^{13}\text{C}$  NMR spectrum of Compound 3

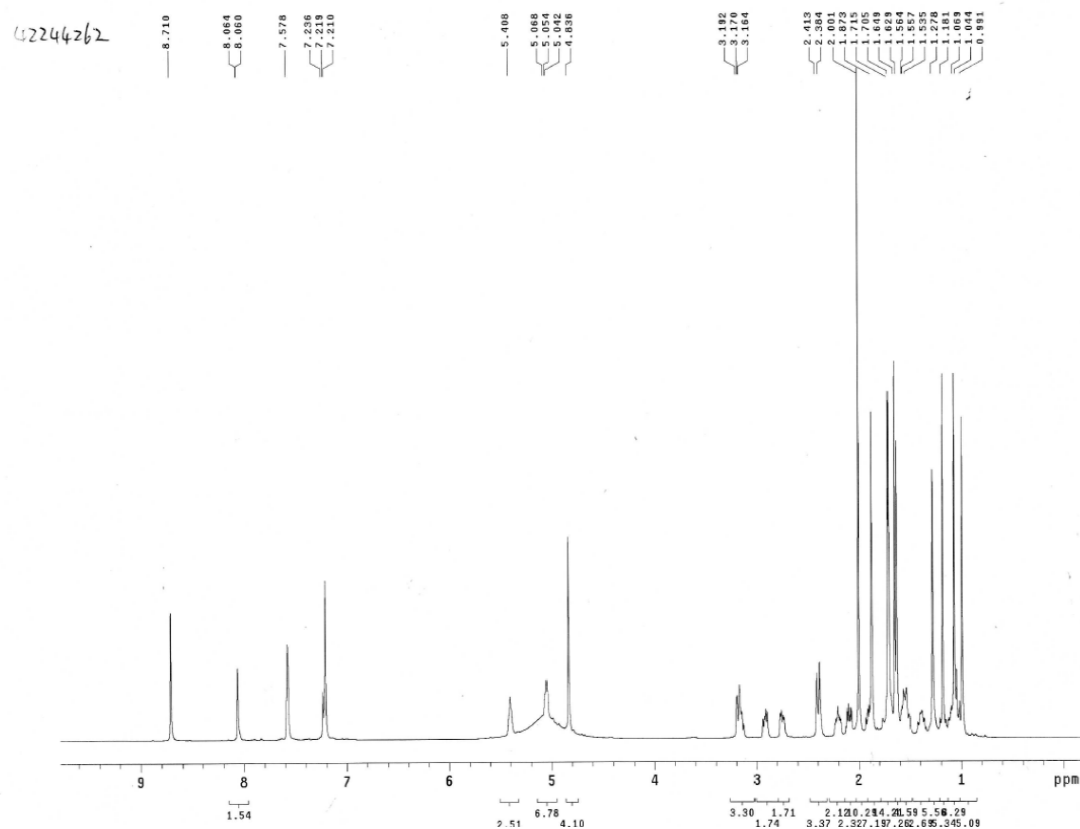

**Figure S7:**  $^1\text{H}$  NMR spectrum of Compound 4

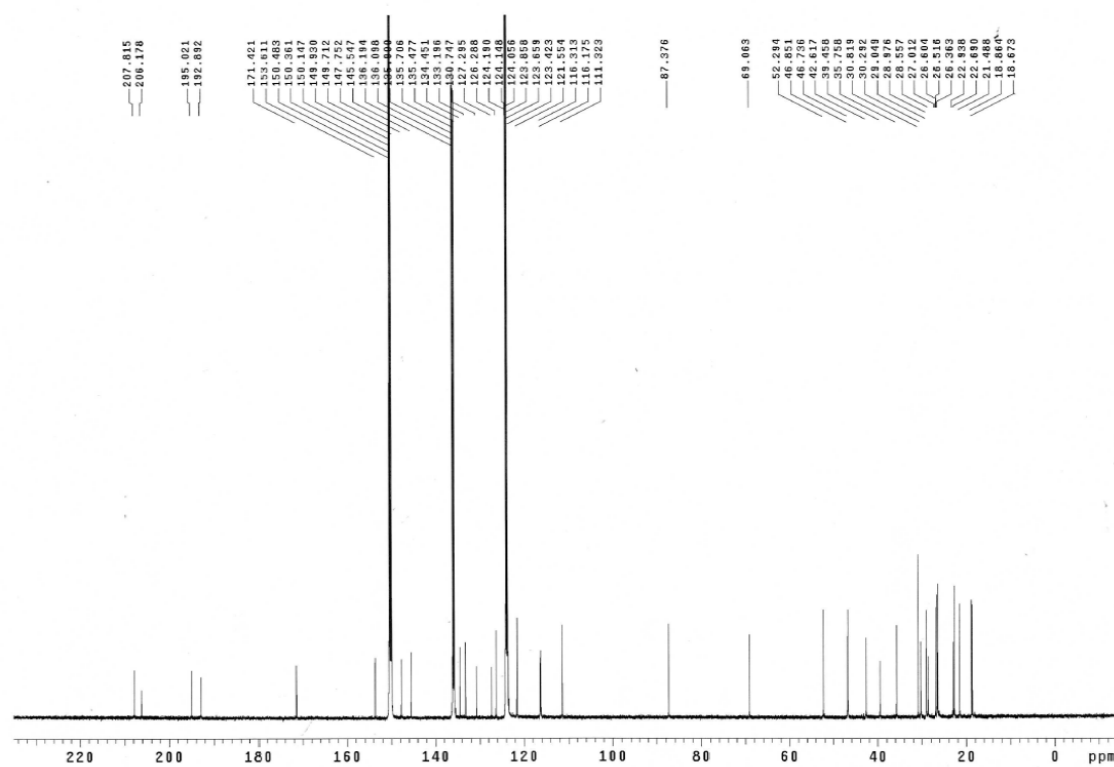

**Figure S8:**  $^{13}\text{C}$  NMR spectrum of Compound 4

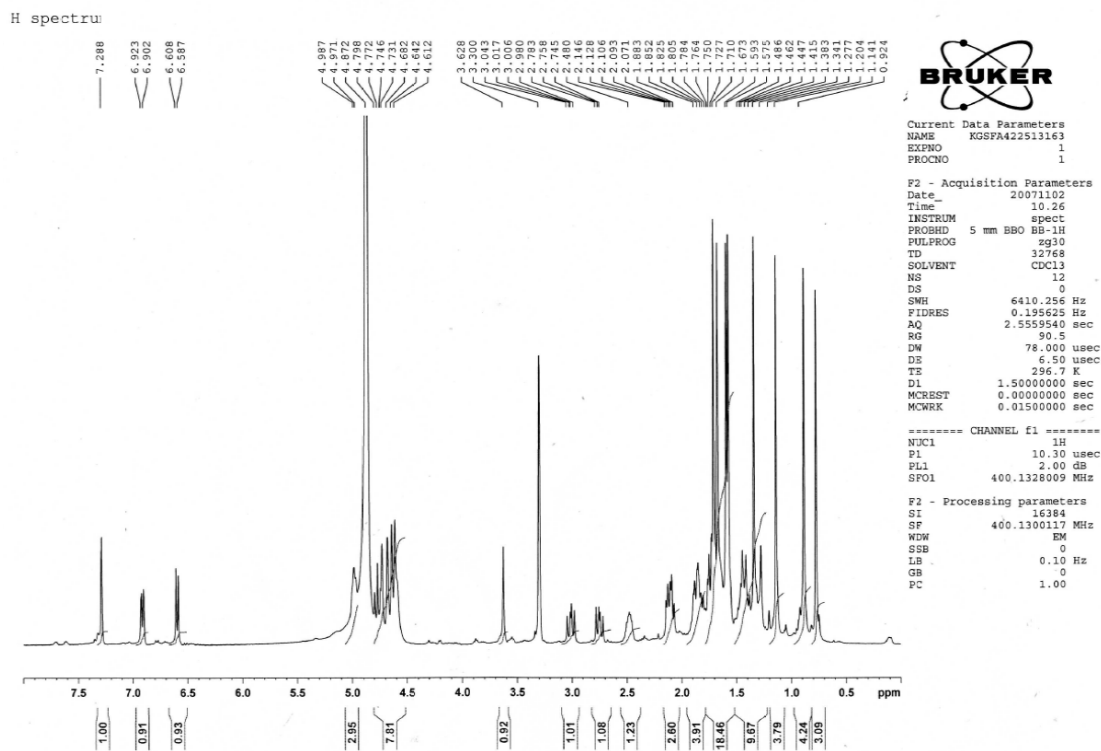

**Figure S9:** <sup>1</sup>H NMR spectrum of Compound 5

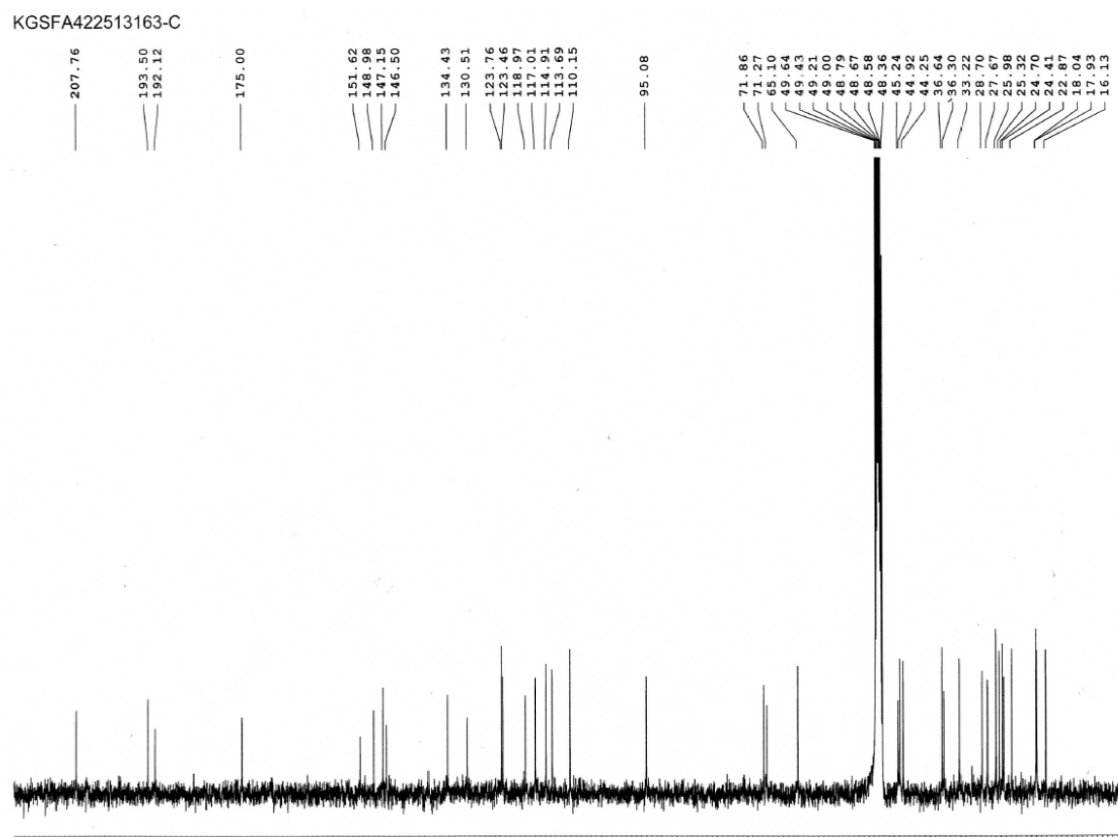

**Figure S10:** <sup>13</sup>C NMR spectrum of Compound 5

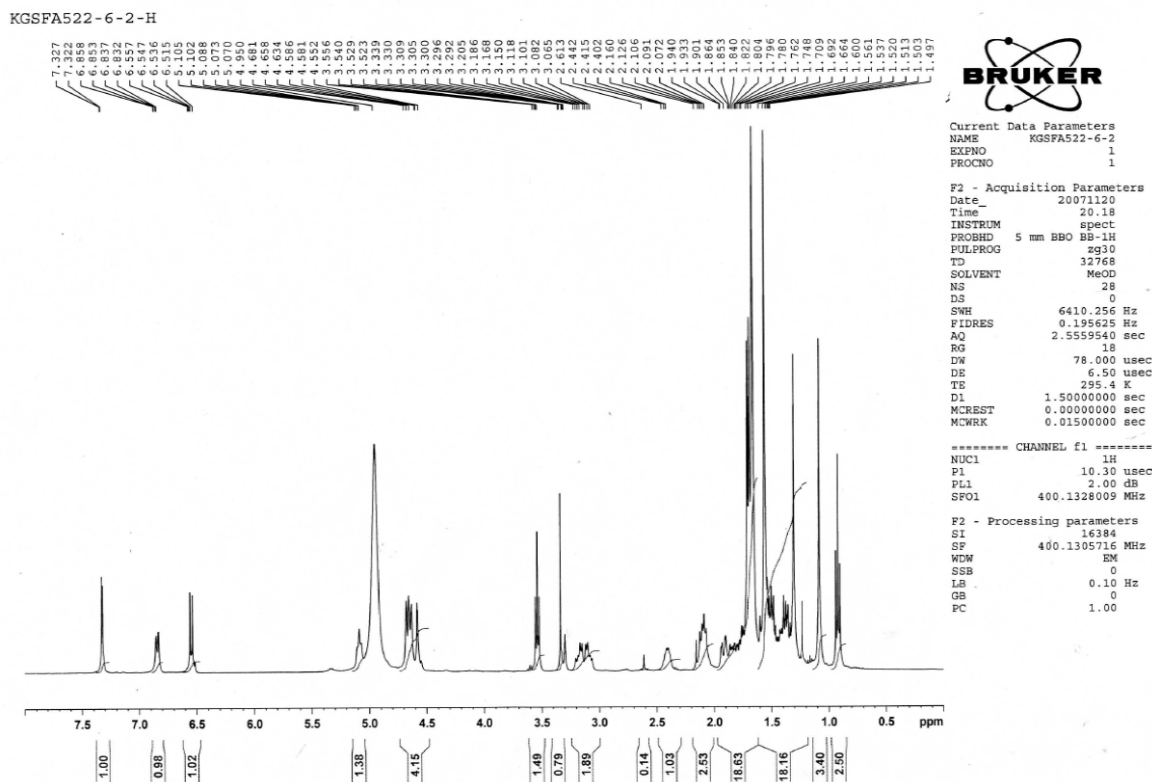

**Figure S11:**  $^1\text{H}$  NMR spectrum of Compound 6

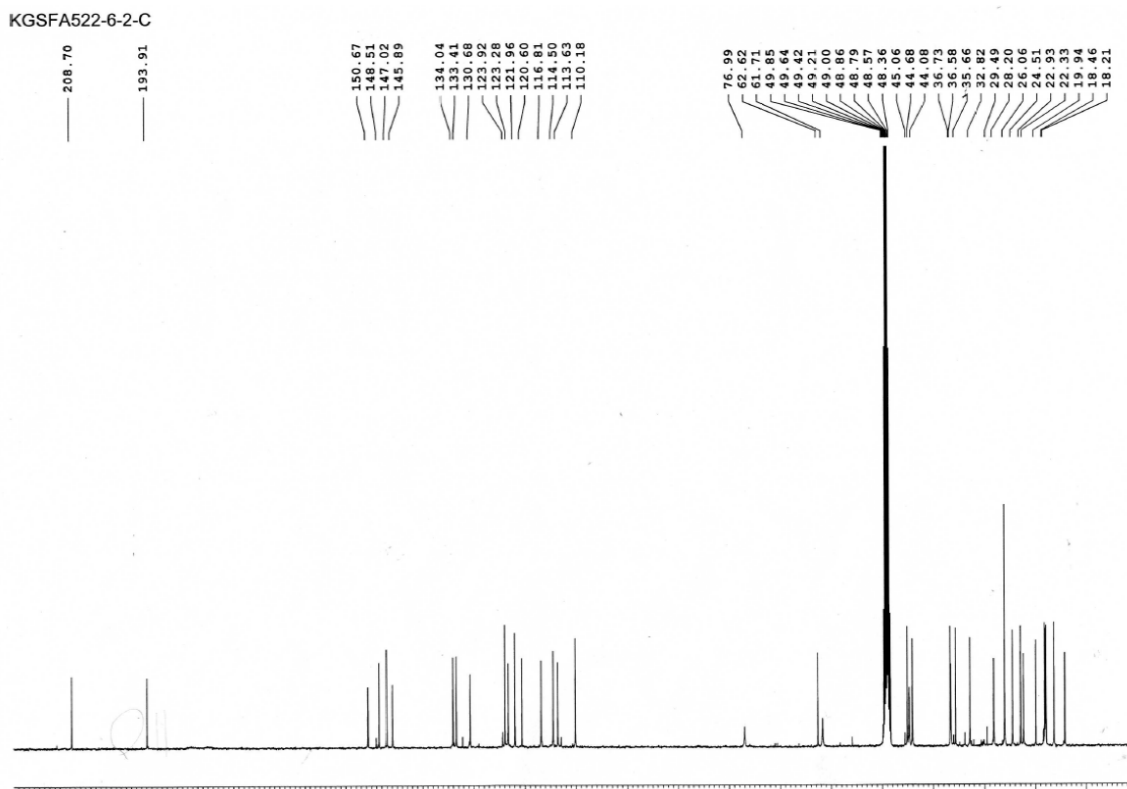

**Figure S12:**  $^{13}\text{C}$  NMR spectrum of Compound 6
